# Supplementary material for: Dioxygen bound cobalt corroles
Source: Royal Society of Chemistry journal article supplement (doi:10.1039/c6cc06982g), 2016-12-12
Supplement: c6cc06982g1.pdf [file c6cc06982g1.pdf]

## Dioxygen bound Cobalt Corroles

Kaustuv Mitra,<sup>‡a</sup> Biswajit Mondal,<sup>‡a</sup> Atif Mahammed<sup>b</sup>, Zeev Gross\*<sup>b</sup>  
Abhishek Dey\*<sup>a</sup>

<sup>a</sup> Department of Inorganic Chemistry, Indian Association for the  
Cultivation of Science, Kolkata, India 700032

<sup>b</sup> Schulich Faculty of Chemistry, Technion-Israel Institute of Technology,  
Haifa 32000, Israel

‡ These authors contributed equally.

\*corresponding author, email: [icad@iacs.res.in](mailto:icad@iacs.res.in), [chr10zg@tx.technion.ac.il](mailto:chr10zg@tx.technion.ac.il)

## METHODS

**Materials.** The complexes are synthesized as previously reported. Sodium borohydride and cobaltocene were purchased from Rankem and Sigma-Aldrich respectively.  $^{18}\text{O}_2$  was obtained from Icon Isotopes. Solvents are purchased from Merck (HPLC grade) and purified and dried by passing through an activated alumina purification system (MBraun SPS) and stored in an anaerobic glove box maintained in Argon atmosphere.

**EPR spectroscopy.** All the electron paramagnetic resonance (EPR) spectra were recorded on a JEOL instrument. The EPR spectra were measured at 77 K. The EPR signal due to CoCorrole oxy vanishes with a  $\sim t_{1/2} < 60\text{s}$  while warming up to room temperature.

**Resonance Raman spectroscopy.** Resonance Raman (rR) data were collected using 413.1 nm excitation from a Kr<sup>+</sup> ion source (Coherent Inc.) and a Trivista 555 triple spectrophotometer (gratings used in the three stages were 900, 900, and 1800 grooves/mm) fitted with an electronically cooled Pixis CCD camera (Princeton Instruments). The irradiation power was limited to 10 mW at the sample to avoid degradation. Data were collected at room temperature and 77 K for 200 s.

**Experimental Details.** A 1.167 mg portion of  $\text{CoCl}_8$  catalyst was dissolved in 1 mL of dry degassed tetrahydrofuran (THF) solvent so that the final strength was 1 mM. A 2.4 mg portion of  $\text{NaBH}_4$  was dissolved in minimum volume of methanol and diluted with dry, degassed THF to make the final volume 1 mL, so that the final strength was 10 mM. Next 200  $\mu\text{L}$  of this 1 mM  $\text{CoCl}_8$  solution was taken in two EPR tubes. To both EPR tubes, 1 equiv (20  $\mu\text{L}$ ) of  $\text{NaBH}_4$  solution was added at room temperature. Dry oxygen was then added to one of the EPR tubes at  $-80^\circ\text{C}$ . EPR and rR of both the samples were recorded. The corresponding  $^{18}\text{O}_2$  adducts were prepared by adding dry  $^{18}\text{O}_2$  to the reduced  $\text{CoCl}_8$  samples at  $-80^\circ\text{C}$ . The oxy adduct of Co-H<sub>8</sub> was prepared using the same procedure

**Computational Details.** All calculations were performed at the IACS computer cluster using Gaussian 03 software BP86 functional were used and a mixed basis set with 6-311 g\* on the Co atom and 6-31g\* on the C, N, F, Cl and H atoms were used for optimization. Frequency calculations were performed using the basis set used for optimization, and no negative frequencies were found for the structures reported.

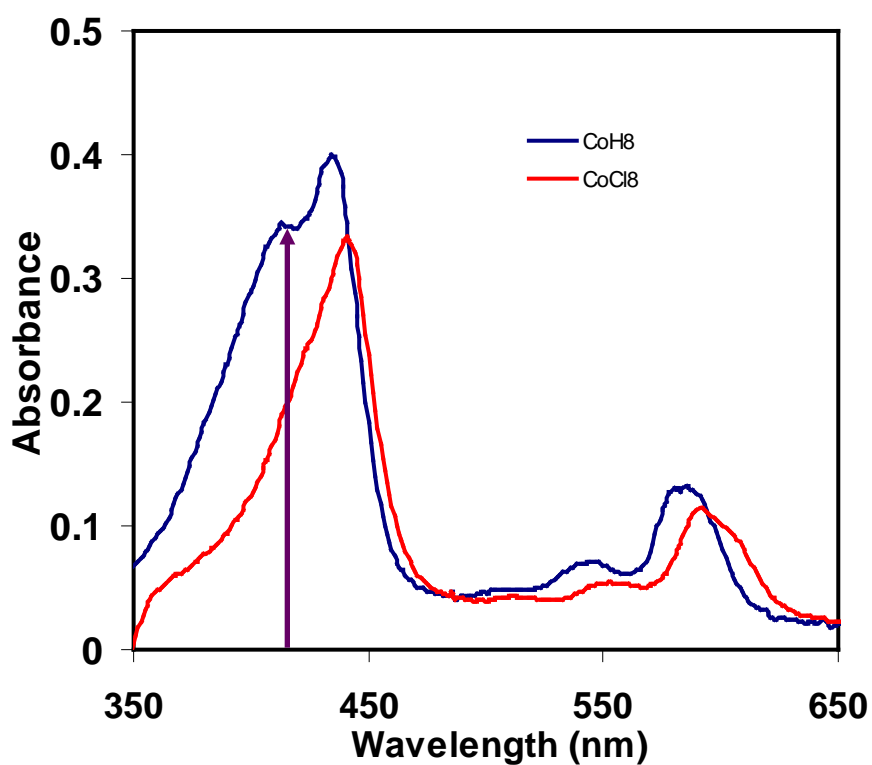

**Figure s1.** Absorption spectra of Co-H<sub>8</sub> (blue) and Co-Cl<sub>8</sub> (red). Purple line showing 413 nm where the laser excitation was made for resonance Raman spectroscopy.

| Table S1. Experimental and theoretical stretching frequencies of Co-O <sub>2</sub> of Cobalt corrole in cm <sup>-1</sup> |                  |                      |                   |                      |
|--------------------------------------------------------------------------------------------------------------------------|------------------|----------------------|-------------------|----------------------|
|                                                                                                                          | CoH <sub>8</sub> |                      | CoCl <sub>8</sub> |                      |
|                                                                                                                          | Experimental     | DFT (scaled by 0.95) | Experimental      | DFT (scaled by 0.95) |
| Co-O                                                                                                                     | 547              | 514                  | 509               | 498                  |
| O-O                                                                                                                      | 1138             | 1153                 | 1146              | 1163                 |

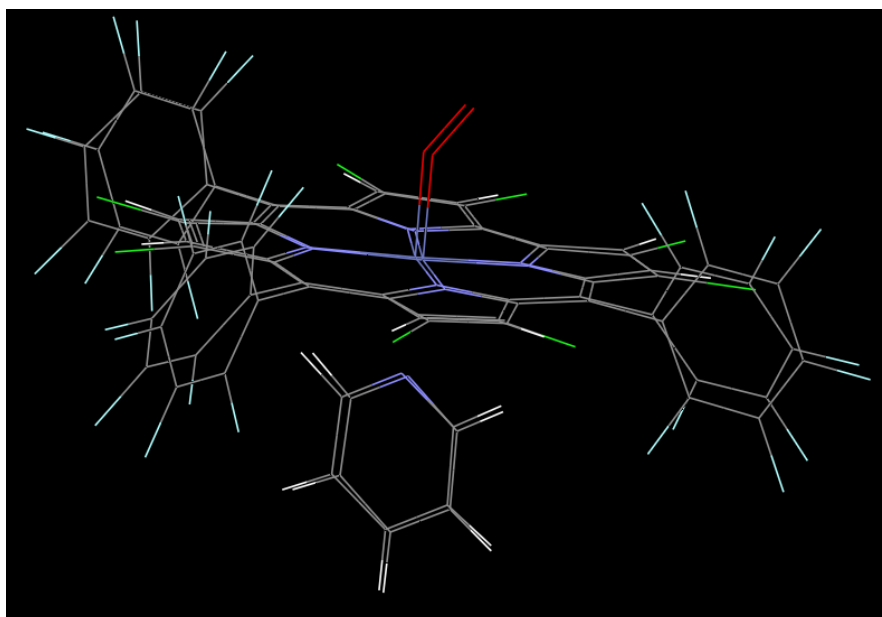

**Figure s2.** Overlay of the optimized geometry of the oxy adduct of CoH<sub>8</sub> and CoCl<sub>8</sub>.

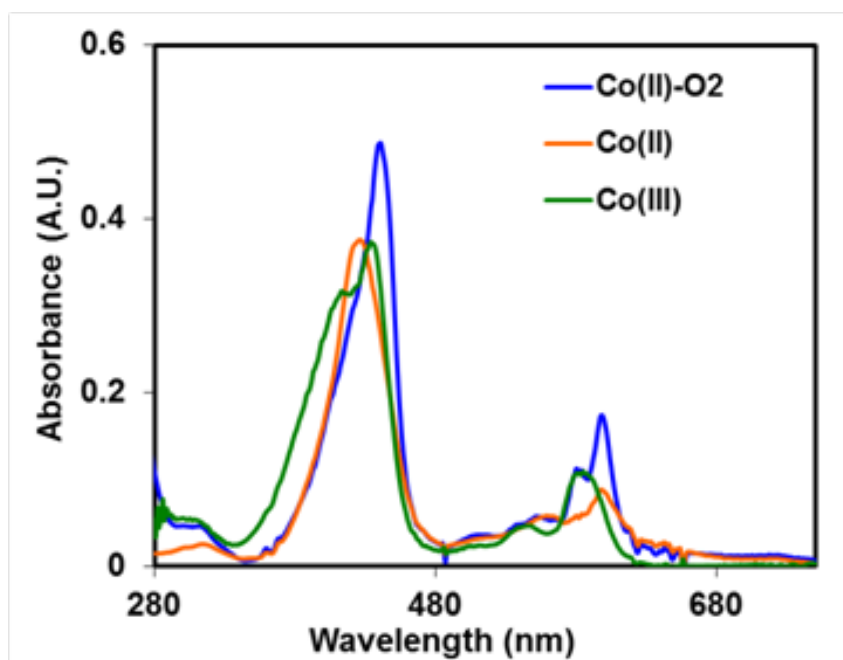

**Figure s3.** Absorption spectra of Co(III)-H<sub>8</sub> (green), Co(II)-H<sub>8</sub> (orange) and oxy adduct of Co-H<sub>8</sub> (blue; measured at -80<sup>0</sup>C) .

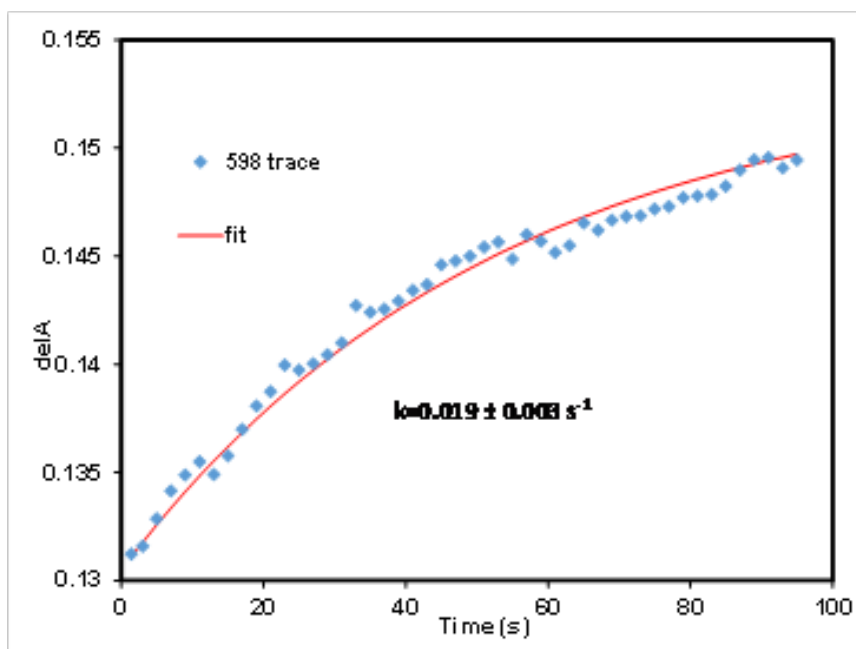

**Figure s4.** Kinetics of oxygen binding of the Co-H<sub>8</sub> complex at -80<sup>0</sup>C. The data shows a decay constant of 0.019±0.003 s<sup>-1</sup>.

### Coordinates of Optimised Geometries

#### 1.CoCl<sub>8</sub>-O<sub>2</sub>

|    |             |            |             |
|----|-------------|------------|-------------|
| Co | 14.04681100 | 4.74871700 | 11.21426400 |
| N  | 12.70865100 | 5.41539200 | 10.05640900 |
| N  | 15.43894200 | 5.45870000 | 10.07432500 |
| N  | 15.23067900 | 4.00406500 | 12.55163800 |
| N  | 12.53058800 | 4.16542300 | 12.18134100 |
| C  | 11.40160400 | 5.18039500 | 10.41989000 |
| C  | 10.55467200 | 5.78023200 | 9.43492800  |
| C  | 11.38588500 | 6.38130100 | 8.49045900  |
| C  | 12.75917200 | 6.15160700 | 8.89852800  |
| C  | 13.99556900 | 6.53606300 | 8.32430700  |

|   |             |            |             |
|---|-------------|------------|-------------|
| C | 15.24728900 | 6.20020700 | 8.90544300  |
| C | 16.56272100 | 6.52261800 | 8.38406600  |
| C | 17.50516000 | 5.98028200 | 9.23165000  |
| C | 16.79495900 | 5.31365800 | 10.31424600 |
| C | 17.35741300 | 4.64762000 | 11.43390300 |
| C | 16.61296200 | 4.05553500 | 12.48671000 |
| C | 17.13259900 | 3.40835000 | 13.68338400 |
| C | 16.05482600 | 2.99608400 | 14.43765300 |
| C | 14.84186000 | 3.36765200 | 13.73323100 |
| C | 13.50690700 | 3.10528500 | 14.14026400 |
| C | 12.38316300 | 3.50494700 | 13.37608300 |
| C | 10.95700500 | 3.35119900 | 13.59442600 |
| C | 10.29529600 | 3.94470300 | 12.52016600 |
| C | 11.29922700 | 4.45902800 | 11.63981600 |
| C | 13.94835600 | 7.28188800 | 7.02948500  |
| C | 13.24597100 | 2.32647800 | 15.38919000 |
| C | 18.85067600 | 4.57661200 | 11.51731900 |
| N | 14.08000100 | 2.94211500 | 10.15678700 |
| C | 14.16489700 | 2.92526100 | 8.80408900  |
| C | 14.16673800 | 1.73993400 | 8.05854600  |
| C | 14.07559400 | 0.51210600 | 8.72827900  |
| C | 13.98218000 | 0.52457900 | 10.12670900 |
| C | 13.98690600 | 1.75254300 | 10.79983100 |

|   |             |             |             |
|---|-------------|-------------|-------------|
| H | 14.23814400 | 1.79387900  | 6.96772000  |
| H | 14.07499400 | -0.43254800 | 8.17305500  |
| H | 13.90497800 | -0.40183200 | 10.70433800 |
| H | 13.91242000 | 1.79165700  | 11.88892500 |
| H | 14.23138400 | 3.89623800  | 8.30805000  |
| C | 19.55994700 | 3.49337500  | 10.97096500 |
| C | 20.95689100 | 3.41179700  | 11.03909900 |
| C | 21.67589800 | 4.43725500  | 11.67003300 |
| C | 20.99677800 | 5.53149400  | 12.22578400 |
| C | 19.59940400 | 5.58873600  | 12.14341000 |
| F | 18.89656900 | 2.49056800  | 10.35822200 |
| F | 21.61651200 | 2.36018200  | 10.50607100 |
| F | 23.02142900 | 4.37101300  | 11.74231600 |
| F | 21.69592300 | 6.51536600  | 12.83097400 |
| F | 18.97615700 | 6.65312000  | 12.68390200 |
| C | 13.92235600 | 6.59395400  | 5.80445700  |
| C | 13.84443800 | 7.26360600  | 4.57694500  |
| C | 13.78313700 | 8.66480900  | 4.56308400  |
| C | 13.80163600 | 9.38067100  | 5.76910400  |
| C | 13.88021400 | 8.68528800  | 6.98370000  |
| F | 13.98254600 | 5.24274000  | 5.78689500  |
| F | 13.82620900 | 6.57936900  | 3.41263100  |
| F | 13.70734100 | 9.32346400  | 3.38859400  |

|    |             |             |             |
|----|-------------|-------------|-------------|
| F  | 13.74179400 | 10.72883600 | 5.74707100  |
| F  | 13.89664500 | 9.39943000  | 8.12424700  |
| C  | 13.13900000 | 0.92592400  | 15.35050200 |
| C  | 12.86050900 | 0.16867900  | 16.49534500 |
| C  | 12.67608200 | 0.82350200  | 17.72182100 |
| C  | 12.77166700 | 2.22114400  | 17.79279300 |
| C  | 13.05125200 | 2.95460600  | 16.63150100 |
| F  | 13.31201900 | 0.26637200  | 14.18194700 |
| F  | 12.76760500 | -1.17717100 | 16.43110900 |
| F  | 12.40796000 | 0.10873200  | 18.83368200 |
| F  | 12.59258700 | 2.84371300  | 18.97680700 |
| F  | 13.13854400 | 4.29380000  | 16.73180100 |
| O  | 14.13338700 | 6.39432700  | 12.18507200 |
| O  | 13.05199300 | 7.02232200  | 12.46579800 |
| Cl | 10.78672800 | 7.24375000  | 7.10563100  |
| Cl | 16.99097400 | 7.42405900  | 6.96186300  |
| Cl | 19.21098700 | 6.13775900  | 8.93530400  |
| Cl | 18.77217800 | 3.14615600  | 14.19812900 |
| Cl | 16.23466300 | 2.18987300  | 15.96623700 |
| Cl | 10.13048700 | 2.59265800  | 14.92204300 |
| Cl | 8.57572900  | 4.01276200  | 12.33271700 |
| Cl | 8.82473200  | 5.78685100  | 9.37699100  |



## 2.CoH<sub>8</sub>-O<sub>2</sub>

|    |             |            |             |
|----|-------------|------------|-------------|
| Co | 14.01539900 | 4.71714300 | 11.19367400 |
| N  | 12.69238300 | 5.38558800 | 10.04151300 |
| N  | 15.40110200 | 5.43445100 | 10.08244900 |
| N  | 15.18973300 | 3.96192800 | 12.50530400 |
| N  | 12.50969100 | 4.13194600 | 12.14954200 |
| C  | 11.38207700 | 5.16972400 | 10.40225300 |
| C  | 10.53479500 | 5.79820100 | 9.43149000  |
| C  | 11.37174100 | 6.39996100 | 8.49261700  |
| C  | 12.73533600 | 6.13451300 | 8.89503900  |
| C  | 13.98218600 | 6.51733200 | 8.33157700  |
| C  | 15.23295000 | 6.16963300 | 8.91382800  |
| C  | 16.54061900 | 6.47486300 | 8.37447700  |
| C  | 17.47760400 | 5.93651700 | 9.22837600  |
| C  | 16.75530400 | 5.29614700 | 10.30769700 |
| C  | 17.31674900 | 4.63109600 | 11.42867400 |
| C  | 16.56764000 | 4.02746900 | 12.47201000 |
| C  | 17.09507500 | 3.41447600 | 13.67289600 |
| C  | 16.01880000 | 2.98516700 | 14.41766000 |
| C  | 14.81812600 | 3.32720600 | 13.68656000 |
| C  | 13.48052500 | 3.06137600 | 14.09298000 |

|   |             |             |             |
|---|-------------|-------------|-------------|
| C | 12.34915600 | 3.46940500  | 13.33752000 |
| C | 10.92923300 | 3.31308100  | 13.56490200 |
| C | 10.26673200 | 3.91873200  | 12.49825200 |
| C | 11.27639900 | 4.43337800  | 11.61981200 |
| C | 13.96977700 | 7.30083700  | 7.06638400  |
| C | 13.25558100 | 2.29536700  | 15.34873700 |
| C | 18.80382300 | 4.57725600  | 11.53015600 |
| N | 14.05064300 | 2.92844600  | 10.12397900 |
| C | 14.05120900 | 2.92868300  | 8.76857700  |
| C | 14.04549100 | 1.75150800  | 8.00955600  |
| C | 14.03564700 | 0.51385800  | 8.66785100  |
| C | 14.02901400 | 0.50946900  | 10.06966900 |
| C | 14.03572400 | 1.73001600  | 10.75679800 |
| H | 14.04752200 | 1.81807600  | 6.91666400  |
| H | 14.03148200 | -0.42485400 | 8.10187900  |
| H | 14.01976900 | -0.42587200 | 10.63871800 |
| H | 14.03480300 | 1.76101300  | 11.84897900 |
| H | 14.05121800 | 3.90912200  | 8.28614200  |
| C | 19.50991100 | 3.35857200  | 11.43867000 |
| C | 20.90736300 | 3.28900400  | 11.54323000 |
| C | 21.64841900 | 4.46413100  | 11.73111200 |
| C | 20.98336900 | 5.69510700  | 11.81971000 |
| C | 19.58336500 | 5.73760300  | 11.72787000 |

|   |             |             |             |
|---|-------------|-------------|-------------|
| F | 18.84655800 | 2.20221600  | 11.22896000 |
| F | 21.54844200 | 2.10214600  | 11.44318800 |
| F | 22.99505400 | 4.41014600  | 11.82515100 |
| F | 21.69571700 | 6.82762700  | 12.01412300 |
| F | 18.99161900 | 6.94203100  | 11.84824600 |
| C | 13.46840500 | 6.74961300  | 5.86803200  |
| C | 13.41549700 | 7.47610300  | 4.66953300  |
| C | 13.88588500 | 8.79665500  | 4.63940300  |
| C | 14.40063600 | 9.37596200  | 5.80792100  |
| C | 14.43071500 | 8.63332900  | 6.99866600  |
| F | 13.04045200 | 5.46771400  | 5.83715100  |
| F | 12.93692700 | 6.90933100  | 3.53850000  |
| F | 13.84568100 | 9.50509000  | 3.49002700  |
| F | 14.84304800 | 10.65280800 | 5.78140000  |
| F | 14.90747900 | 9.24439400  | 8.10006700  |
| C | 13.66027000 | 0.94898300  | 15.47347400 |
| C | 13.45323200 | 0.20541800  | 16.64425400 |
| C | 12.80534400 | 0.80093700  | 17.73593700 |
| C | 12.37681400 | 2.13278200  | 17.64566500 |
| C | 12.60791300 | 2.86106600  | 16.46802300 |
| F | 14.25146100 | 0.31795200  | 14.43397500 |
| F | 13.84928000 | -1.08535900 | 16.72268600 |
| F | 12.59394000 | 0.09429000  | 18.86755600 |

|   |             |            |             |
|---|-------------|------------|-------------|
| F | 11.76311300 | 2.70947700 | 18.70292300 |
| F | 12.20203500 | 4.14508300 | 16.44184700 |
| H | 10.47365800 | 2.81637600 | 14.42330700 |
| H | 9.18748700  | 3.99670800 | 12.35374700 |
| H | 9.44320700  | 5.80794500 | 9.44060400  |
| H | 11.06866500 | 6.98470400 | 7.62225600  |
| H | 16.04297600 | 2.49650000 | 15.39295200 |
| H | 18.15192300 | 3.34062900 | 13.93259700 |
| H | 16.72681900 | 7.02368700 | 7.45013800  |
| H | 18.56296300 | 5.96931900 | 9.12578000  |
| O | 14.09894300 | 6.35015600 | 12.18640500 |
| O | 13.01769300 | 6.98974900 | 12.46077100 |
